# Supplementary material
Source: publisher site journal article supplement (http://kjim.org/upload/media/kjim-2019-395-suppl3.pdf)
Supplement: Supplementary file 1 [file kjim-2019-395-suppl3.pdf]

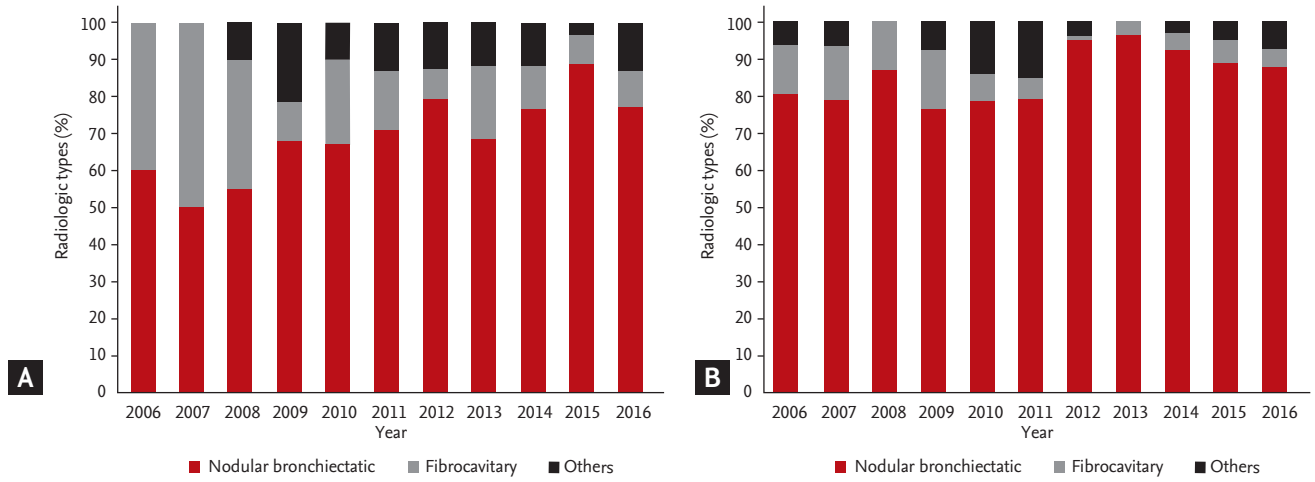

**Supplementary Figure 1.** Radiologic types of nontuberculous mycobacterial pulmonary disease in (A) male and (B) female patients.
